# Supplementary material for: A Nutrition Environment Measures Survey for Dollar Stores (NEMS-DS) in Rural South Carolina: Assessing Nutrition Equity and WIC Readiness
Source: Research Square preprint supplement (doi:10.21203/rs.3.rs-8273196/v1), 2025-12-15
Supplement: Supplementary file 1 [file 1b3f93f529a1fb3284f38ea5.docx]

**Appendix A**

**NEMS-DS**

**The Nutrition Environment Measures Survey for Dollar Stores**

**Data Collection Information**

Date of visit:_______________

Time of visit:_______________

Data Collector Names:_____________________________________________________________

Store Address:___________________________________________________________________

Store Hours of Operation:__________________________________________________________

Completion Tips

Remember to follow the tips below to decrease the data cleaning time for data entry.

1. If you are completing a paper form, WRITE LEGIBLY! This form will likely be entered by someone else, and your work must be legible to them.
2. Check your work.
3. Use the correct line/check box.
4. Write your comments and notes on the sections provided. Only use the margins as a last resort.
5. Do not cross through any individual items or sections.
6. If you are using a paper form, please USE PENCIL. Erase any stray marks you make.
7. For data on specific products, only fill in subsequent information if the product is available.
8. Complete only 1 assessment form per store; when completing in teams, one data collector completes the form while the other data collector assists.
9. Check instructions and the manual to ensure that you follow the protocol.
10. Call your site preceptor if you have any questions.

|  | **CIRCLE ONE** | **CONDITIONS OUTSIDE STORE** | **NO** | **YES** | **CONDITIONS INSIDE STORE** | **NO** | **YES** |
| --- | --- | --- | --- | --- | --- | --- | --- |
| **Store brand** |  | Parking | 0 | 1 | Trash/debris | 0 | 1 |
| **Dollar Tree** | 1 | Trash/debris | 0 | 1 | Cluttered floors | 0 | 1 |
| **Family Dollar** | 2 | Broken glass | 0 | 1 | Foul odor | 0 | 1 |
| **Dollar General** | 3 | Graffiti | 0 | 1 | Panhandling | 0 | 1 |
| **Combo Store (Family Dollar/Dollar Tree)** | 4 | Loitering | 0 | 1 | High shelving/can't see across store | 0 | 1 |
| **99 Cent Only Store** | 5 | Shopping cart rails | 0 | 1 | Security Cameras | 0 | 1 |
| **Other: _________** | 6 | Panhandling | 0 | 1 | Security Personnel | 0 | 1 |
|  |  | Bus stop nearby | 0 | 1 | Other: ___ | 0 | 1 |
|  |  | Landscaping | 0 | 1 | Shopping cart rails | 0 | 1 |
|  |  | Security Cameras | 0 | 1 | **FEDERAL PROGRAMS** |  |  |
|  |  | Security bars on windows/doors | 0 | 1 | Does the store accept EBT/SNAP? | 0 | 1 |
|  |  | Other: |  |  | Does the store accept WIC? | 0 | 1 |

| **Promoted Items** | | |
| --- | --- | --- |
|  | YES | NO |
| Can fresh produce (fruits and/or vegetables) be seen from the front entrance? | [   ] | [   ] |
| Can frozen produce (fruits and/or vegetables) be seen from the front entrance? | [   ] | [   ] |
| Can canned produce (fruits and/or vegetables) be seen from the front entrance? | [   ] | [   ] |
| Can salty snacks be seen from the front entrance? | [   ] | [   ] |
| Can sweet snacks be seen from the front entrance? | [   ] | [   ] |
| Can sugar sweetened beverages be seen from the front entrance? | [   ] | [   ] |
| Can bottled water be seen from the front entrance? | [   ] | [   ] |

Number of checkouts (include all checkouts: e-checkouts/employee stationed/no employee stationed)

| **Checkout Items** | | |
| --- | --- | --- |
|  | YES | NO |
| Are fresh produce (fruits and/or vegetables) available at checkout? | [   ] | [   ] |
| Are frozen produce (fruits and/or vegetables) available at checkout? | [   ] | [   ] |
| Are canned produce (fruits and/or vegetables) available at checkout? | [   ] | [   ] |
| Are salty snacks be seen from the front entrance available at checkout? | [   ] | [   ] |
| Are sweet snacks be seen from the front entrance available at checkout? | [   ] | [   ] |
| Are sugar sweetened beverages be seen from the front entrance available at checkout? | [   ] | [   ] |
| Are bottled water be seen from the front entrance available at checkout? | [   ] | [   ] |

**Fruits & Vegetables: FRESH (Enter other items in blank boxes)**

| **Fruits** | **Amount** | **Acceptability** | **Price (per item/lb.)** | **Vegetables** | **Amount** | **Acceptability** | **Price (per item/lb.)** |
| --- | --- | --- | --- | --- | --- | --- | --- |
| **Bananas** | 0 1 2 3+ | 0 1 |  | **Potatoes** | 0 1 2 3+ | 0 1 |  |
| **Apples** | 0 1 2 3+ | 0 1 |  | **Onions** | 0 1 2 3+ | 0 1 |  |
| **Oranges** | 0 1 2 3+ | 0 1 |  | **Celery** | 0 1 2 3+ | 0 1 |  |
| **Lemons** | 0 1 2 3+ | 0 1 |  | **Leafy lettuce (any kind bagged or non-bagged)** | 0 1 2 3+ | 0 1 |  |
| **Strawberries** | 0 1 2 3+ | 0 1 |  | **Peppers** | 0 1 2 3+ | 0 1 |  |
| **Tomatoes** | 0 1 2 3+ | 0 1 |  | **Cucumbers** | 0 1 2 3+ | 0 1 |  |
|  | 0 1 2 3+ | 0 1 |  |  | 0 1 2 3+ | 0 1 |  |
|  | 0 1 2 3+ | 0 1 |  |  | 0 1 2 3+ | 0 1 |  |
|  | 0 1 2 3+ | 0 1 |  |  | 0 1 2 3+ | 0 1 |  |
|  | 0 1 2 3+ | 0 1 |  |  | 0 1 2 3+ | 0 1 |  |
|  | 0 1 2 3+ | 0 1 |  |  | 0 1 2 3+ | 0 1 |  |
|  | 0 1 2 3+ | 0 1 |  |  | 0 1 2 3+ | 0 1 |  |
| **Total Number of Fresh, WIC-approved Fruit Varieties:** | **Total Number of Fresh Fruit Varieties:** | | **Total Number of Fresh, WIC-approved Vegetable Varieties:** | | **Total Number of Fresh Vegetable Varieties:** | | |

**FRESH JUICE: FRUIT AND VEGETABLE (Refrigerated)**

**Location (Fresh/Perishable Fruit Juice): SD H EL L Other_____________**

**Location (Fresh/Perishable Vegetable Juice): SD H EL L Other_____________**

| **Fruit/Vegetable** | **Type (circle one)** | **Size (circle one)** | **Amount** | **Price** |
| --- | --- | --- | --- | --- |
| **Example: Apples** | Fruit Vegetable | 11.5oz 12oz 48oz 64oz Other:___ | 0 1 2 3+ |  |
|  | Fruit Vegetable | 11.5oz 12oz 48oz 64oz Other:___ | 0 1 2 3+ |  |
|  | Fruit Vegetable | 11.5oz 12oz 48oz 64oz Other:___ | 0 1 2 3+ |  |
|  | Fruit Vegetable | 11.5oz 12oz 48oz 64oz Other:___ | 0 1 2 3+ |  |
|  | Fruit Vegetable | 11.5oz 12oz 48oz 64oz Other:___ | 0 1 2 3+ |  |
|  | Fruit Vegetable | 11.5oz 12oz 48oz 64oz Other:___ | 0 1 2 3+ |  |
|  | Fruit Vegetable | 11.5oz 12oz 48oz 64oz Other:___ | 0 1 2 3+ |  |
|  | Fruit Vegetable | 11.5oz 12oz 48oz 64oz Other:___ | 0 1 2 3+ |  |
| **Total Number of WIC-approved fresh/perishable Produce Juice Varieties:** | | | **Total Number of fresh/ perishable Produce Juice Varieties:** | |

**Fruits: FROZEN & FROZEN Juice Concentrate**

**Location (Frozen Fruits): SD H EL L Other_____________**

**Location (Frozen Juice Concentrate): SD H EL L Other_____________**

| **Fruit** | **Amount** | **Size (oz./lbs.)** | **Price (per bag/container)** | **Frozen Concentrate** | **Size** | **Amount** | **Price (per bag/container)** |
| --- | --- | --- | --- | --- | --- | --- | --- |
|  | 0 1 2 3+ |  |  | Concentrate | 11.5oz 12oz Other:__ | 0 1 2 3+ |  |
|  | 0 1 2 3+ |  |  | Concentrate | 11.5oz 12oz Other:__ | 0 1 2 3+ |  |
|  | 0 1 2 3+ |  |  | Concentrate | 11.5oz 12oz Other:__ | 0 1 2 3+ |  |
|  | 0 1 2 3+ |  |  | Concentrate | 11.5oz 12oz Other:__ | 0 1 2 3+ |  |
|  | 0 1 2 3+ |  |  | Concentrate | 11.5oz 12oz Other:__ | 0 1 2 3+ |  |
|  | 0 1 2 3+ |  |  | Concentrate | 11.5oz 12oz Other:__ | 0 1 2 3+ |  |
|  | 0 1 2 3+ |  |  | Concentrate | 11.5oz 12oz Other:__ | 0 1 2 3+ |  |
|  | 0 1 2 3+ |  |  | Concentrate | 11.5oz 12oz Other:__ | 0 1 2 3+ |  |
|  | 0 1 2 3+ |  |  | Concentrate | 11.5oz 12oz Other:__ | 0 1 2 3+ |  |
|  | 0 1 2 3+ |  |  | Concentrate | 11.5oz 12oz Other:__ | 0 1 2 3+ |  |
| **Total Number of Frozen, WIC-approved Fruit and Fruit Juice Varieties:** | | | **Total Number of Frozen Fruit and Fruit Juice Varieties:** | | | | |

**Vegetables: FROZEN**

**Location Vegetables (Frozen): SD H EL L Other_____________**

| **Vegetable** | **Amount** | **Size (oz./lbs.)** | **Price (per bag/container)** |
| --- | --- | --- | --- |
|  | 0 1 2 3+ |  |  |
|  | 0 1 2 3+ |  |  |
|  | 0 1 2 3+ |  |  |
|  | 0 1 2 3+ |  |  |
|  | 0 1 2 3+ |  |  |
|  | 0 1 2 3+ |  |  |
|  | 0 1 2 3+ |  |  |
|  | 0 1 2 3+ |  |  |
|  | 0 1 2 3+ |  |  |
| **Total Number of Frozen, WIC-approved Vegetable Varieties:** | | **Total Number of Frozen Vegetable Varieties:** | |

**Grains and Tortillas: FRESH and FROZEN**

| **Grains** | **Type** | **Amount** | **Expired? (1 for Yes)** | **Size** | **Type** | **Amount** | **Expired? (1 for Yes)** |
| --- | --- | --- | --- | --- | --- | --- | --- |
| Whole Grain Tortilla: Corn | Fresh | 0  1  2  3+ | 0             1 | 16oz  Other:__ | Frozen | 0  1  2  3+ | ​​0             1 |
| Whole Grain Tortilla: Wheat | Fresh | 0  1  2  3+ | 0             1 | 16oz  Other:__ | Frozen | 0  1  2  3+ | ​​0             1 |
| Whole Grain Bread | Fresh | 0  1  2  3+ | 0             1 | 16oz  Other:__ | Frozen | 0  1  2  3+ | ​​0             1 |
| Whole Grain Buns | Fresh | 0  1  2  3+ | 0             1 | 16oz  Other:__ | Frozen | 0  1  2  3+ | ​​0             1 |
| Whole Grain Rolls | Fresh | 0  1  2  3+ | 0             1 | 16oz  Other:__ | Frozen | 0  1  2  3+ | ​​0             1 |
| Whole Grain Pasta | Fresh | 0  1  2  3+ | 0             1 | 16oz  Other:__ | Frozen | 0  1  2  3+ | ​​0             1 |
|  | Fresh | 0  1  2  3+ | 0             1 | 16oz  Other:__ | Frozen | 0  1  2  3+ | ​​0             1 |
|  | Fresh | 0  1  2  3+ | 0             1 | 16oz  Other:__ | Frozen | 0  1  2  3+ | ​​0             1 |
|  | Fresh | 0  1  2  3+ | 0             1 | 16oz  Other:__ | Frozen | 0  1  2  3+ | ​​0             1 |
| **Total Number of WIC-approved Fresh (Refrigerated) Tortilla/Breads/Grains Varieties:** | | **Total Number of Fresh (Refrigerated) Tortilla/Breads/Grains Varieties:** | | **Total Number of WIC-approved FROZEN Tortilla/Breads/Grains Varieties:** | | **Total Number of FROZEN Tortilla/Breads/Grains Varieties:** | |

**Dairy and Dairy Substitutes**

|  | **Perishable** | **Amount** | **Expired? (1 for Yes)** | **Price** | **Size** | **Shelf-Stable** | **Amount** | **Expired? (1 for Yes)** |
| --- | --- | --- | --- | --- | --- | --- | --- | --- |
| Whole Cow's Milk | Fresh | 0 1 2 3+ | 0 1 |  | Gallon  Half gallon  Quart |  |  |  |
| Whole Cow's Milk |  |  |  |  |  | Shelf-stable, Liquid | 0 1 2 3+ | 0 1 |
| Whole Cow's Milk |  |  |  |  |  | Shelf-stable, Powdered | 0 1 2 3+ | 0 1 |
| 1% or Skim Cow's Milk | Fresh | 0 1 2 3+ | 0 1 |  | Gallon  Half gallon  Quart |  |  |  |
| 1% or Skim Cow's Milk |  |  |  |  |  | Shelf-stable, Liquid | 0 1 2 3+ | 0 1 |
| 1% or Skim Cow's Milk |  |  |  |  |  | Shelf-stable, Powdered | 0 1 2 3+ | 0 1 |
|  | **Perishable** | **Amount** | **Expired? (1 for Yes)** | **Price** | **Size** | **Shelf-Stable** | **Amount** | **Expired? (1 for Yes)** |
| 2% Cow's Milk | Fresh | 0 1 2 3+ | 0 1 |  | Gallon  Half gallon  Quart |  |  |  |
| 2% Cow's Milk |  |  |  |  |  | Shelf-stable, Liquid | 0 1 2 3+ | 0 1 |
| 2% Cow's Milk |  |  |  |  |  | Shelf-stable, Powdered | 0 1 2 3+ | 0 1 |
| Non-fat Cow's Milk | Fresh | 0 1 2 3+ | 0 1 |  | Gallon  Half gallon  Quart |  |  |  |
| Non-fat Cow's Milk |  |  |  |  |  | Shelf-stable, Liquid | 0 1 2 3+ | 0 1 |
| Non-fat Cow's Milk |  |  |  |  |  | Shelf-stable, Powdered | 0 1 2 3+ | 0 1 |
| **Total Number of WIC-approved Fresh Cow’s Milk Varieties:** | | **Total Number of Fresh Cow’s Milk Varieties:** | |  | **Total Number of WIC-approved Shelf-Stable Cow’s Milk Varieties:** | | **Total Number of Shelf-Stable Cow’s Milk Varieties:** | |
| ***Milk Substitutions:*** |  |  |  |  |  |  |  |  |
| Milk (Goat) | Fresh | 0 1 2 3+ | 0 1 |  |  |  |  |  |
| Fortified Soy-based Beverage | Fresh | 0 1 2 3+ | 0 1 |  |  | Shelf-stable, Liquid | 0 1 2 3+ | 0 1 |
| Lactose-free milk | Fresh | 0 1 2 3+ | 0 1 |  |  | Shelf-stable, Liquid | 0 1 2 3+ | 0 1 |
| **Total Number of WIC-approved Fresh Dairy Sub Varieties:** | | **Total Number of Fresh Dairy Sub Varieties:** | | | **Total Number of WIC-approved Shelf-Stable Dairy Sub Varieties:** | | **Total Number of Shelf-Stable Dairy Sub Varieties:** | |
| Whole Milk Yogurt (Cow) | Fresh | 0 1 2 3+ | 0 1 |  | 32oz  64oz  Other:__ |  |  |  |
| Lower fat Yogurts (includes 2%, low fat, and nonfat) (cow) | Fresh | 0 1 2 3+ | 0 1 |  | 32oz  64oz  Other:__ |  |  |  |
| Yogurt (Plant-based) | Fresh | 0 1 2 3+ | 0 1 |  | 32oz  64oz  Other:__ |  |  |  |
| **Total Number of WIC-approved Fresh Yogurt Varieties:** | | **Total Number of Fresh Yogurt Varieties:** | | | |  |  |  |
|  | **Perishable** | **Amount** | **Expired? (1 for Yes)** | **Price** | **Size** |  |  |  |
| Cheese (Cow, Blocks) ___________ | Fresh | 0 1 2 3+ | 0 1 |  | 16oz. 8oz.  Other: ___ |  |  |  |
| Cheese (Cow, Blocks) ___________ | Fresh | 0 1 2 3+ | 0 1 |  | 16oz. 8oz.  Other: ___ |  |  |  |
| Cheese (Cow, Blocks) ____________ | Fresh | 0 1 2 3+ | 0 1 |  | 16oz. 8oz.  Other: ___ |  |  |  |
| Cheese (Cow, Slices) ____________ | Fresh | 0 1 2 3+ | 0 1 |  | 16oz. 8oz.  Other: ___ |  |  |  |
| Cheese (Cow, Slices) ____________ | Fresh | 0 1 2 3+ | 0 1 |  | 16oz. 8oz.  Other: ___ |  |  |  |
| Cheese (Cow, Slices) ____________ | Fresh | 0 1 2 3+ | 0 1 |  | 16oz. 8oz.  Other: ___ |  |  |  |
| Cheese (Cow, Shredded) ____________ | Fresh | 0 1 2 3+ | 0 1 |  | 16oz. 8oz.  Other: ___ |  |  |  |
| Cheese (Cow, Shredded) ____________ | Fresh | 0 1 2 3+ | 0 1 |  | 16oz. 8oz.  Other: ___ |  |  |  |
| Cheese (Cow, Stick) ____________ | Fresh | 0 1 2 3+ | 0 1 |  | 16oz. 8oz.  Other: ___ |  |  |  |
| Cheese (Plant-based) | Fresh | 0 1 2 3+ | 0 1 |  | 16oz. 8oz.  Other: ___ |  |  |  |
| **Number of WIC-approved Fresh Cheese Varieties:** | | **Total Number of Fresh Cheese Varieties:** | | |  |  |  |  |
| Tofu (Soy-based) | Fresh | 0 1 2 3+ | 0 1 |  |  |  |  |  |
| **Total Number of WIC-approved Tofu Varieties:** |  | **Total Number of Tofu Varieties:** |  |  |  |  |  |  |

**Proteins/Protein Substitutes (FRESH/FROZEN)**

| **Meat** | **Perishable** | **Amount** | **Expired?** | **Price** | **Size** | **Perishable** | **Amount** | **Size** |
| --- | --- | --- | --- | --- | --- | --- | --- | --- |
| Whole, pieces, ground meat (beef, chicken, pork; etc.) | Fresh | 0 1 2 3+ | 0 1 |  |  | Frozen | 0 1 2 3+ |  |
| Deli Meat (e.g., ham, turkey, salami) | Fresh | 0 1 2 3+ | 0 1 |  |  | Frozen | 0 1 2 3+ |  |
| Bacon (e.g., pork, turkey) | Fresh | 0 1 2 3+ | 0 1 |  |  | Frozen | 0 1 2 3+ |  |
| Sausage (e.g., pork, beef) | Fresh | 0 1 2 3+ | 0 1 |  |  | Frozen | 0 1 2 3+ |  |
| Hot Dogs (e.g., pork, beef) | Fresh | 0 1 2 3+ | 0 1 |  |  | Frozen | 0 1 2 3+ |  |
| Other (enter) | Fresh | 0 1 2 3+ | 0 1 |  |  | Frozen | 0 1 2 3+ |  |
| Other (enter) | Fresh | 0 1 2 3+ | 0 1 |  |  | Frozen | 0 1 2 3+ |  |
| Other (enter) | Fresh | 0 1 2 3+ | 0 1 |  |  | Frozen | 0 1 2 3+ |  |
| **Other** |  |  |  |  |  |  |  |  |
| **Eggs** | Fresh | 0 1 2 3+ | 0 1 |  |  |  |  |  |
| **Total Number of WIC-approved eggs:** | **Total Number of eggs:** | |  |  |  |  |  |  |

| **Meat Centered Meals** | **Meal** | **Amount** |
| --- | --- | --- |
| Beef/pork | Frozen pot pie | 0 1 2 3+ |
|  | Frozen mixed pasta dish (e.g., lasagna) | 0 1 2 3+ |
|  | Frozen pizza | 0 1 2 3+ |
|  | Burger | 0 1 2 3+ |
|  | Other, mixed dish_____________________ | 0 1 2 3+ |
| Chicken/turkey | Frozen pot pie | 0 1 2 3+ |
|  | Frozen mixed pasta dish (e.g., lasagna) | 0 1 2 3+ |
|  | Frozen Pizza | 0 1 2 3+ |
|  | Frozen Nuggets/sticks | 0 1 2 3+ |
|  | Burger | 0 1 2 3+ |
|  | Other, mixed dish_____________________ | 0 1 2 3+ |
| Tofu (meat substitute) | Frozen Tofu Meal | 0 1 2 3+ |
| Other frozen vegetarian option | (e.g., cheese pizza, macaroni and cheese, bean and cheese burrito) | 0 1 2 3+ |

**Proteins/Protein Substitutes (SHELF STABLE)**

|  | **Shelf-Stable** | **Amount** | **Price** | **Size** |
| --- | --- | --- | --- | --- |
| **Fish** |  | 0 1 2 3+ |  |  |
| Tuna | Canned | 0 1 2 3+ |  |  |
| Salmon | Canned | 0 1 2 3+ |  |  |
| Sardines | Canned | 0 1 2 3+ |  |  |
| Mackerel | Canned | 0 1 2 3+ |  |  |
| **Total Number of WIC-approved canned fish varieties:** | | **Total Number of packaged fish varieties:** | |  |
| **Beans/Legumes** |  | 0 1 2 3+ |  |  |
| Beans _______ | D C | 0 1 2 3+ |  |  |
| Beans________ | D C | 0 1 2 3+ |  |  |
| Beans ________ | D C | 0 1 2 3+ |  |  |
| Beans ________ | D C | 0 1 2 3+ |  |  |
| Beans ________ | D C | 0 1 2 3+ |  |  |
| Beans _______ | D C | 0 1 2 3+ |  |  |
| Peas________ | D C | 0 1 2 3+ |  |  |
| Peas________ | D C | 0 1 2 3+ |  |  |
| Peas________ | D C | 0 1 2 3+ |  |  |
| Lentils________ | D C | 0 1 2 3+ |  |  |
| Lentils________ | D C | 0 1 2 3+ |  |  |
| Lentils________ | D C | 0 1 2 3+ |  |  |
| **Number of WIC-approved bean/legume varieties:** |  | **Total Number of bean/legume varieties:** |  |  |
| Peanut Butter | Shelf Stable | 0 1 2 3+ | $ | 16 oz  18 oz  Other: _____ |
| **Total Number of WIC-approved peanut butter varieties:** | | **Total Number of peanut butter varieties:** | | |

**Fruit: Juice and Shelf-Stable**

**Location (Juice): SD H EL L Other_____________**

**Location (Canned): SD H EL L Other_____________**

**Location (Dried): SD H EL L Other_____________**

| **Fruits** | **Shelf-Stable (circle one)** | **Size (circle one)** | **Amount** | **Price** | **Shelf-Stable** | **Amount** | **Shelf-Stable** | **Amount** |
| --- | --- | --- | --- | --- | --- | --- | --- | --- |
| **Example: Apples** | Juice or Concentrate | 11.5oz 12oz  48oz  64oz  Other:___ | 0 1 2 3+ |  | Dried | 0 1 2 3+ | Canned | 0 1 2 3+ |
|  | Juice or Concentrate | 11.5oz 12oz  48oz  64oz  Other:___ | 0 1 2 3+ |  | Dried | 0 1 2 3+ | Canned | 0 1 2 3+ |
|  | Juice or Concentrate | 11.5oz 12oz  48oz  64oz  Other:___ | 0 1 2 3+ |  | Dried | 0 1 2 3+ | Canned | 0 1 2 3+ |
|  | Juice or Concentrate | 11.5oz 12oz  48oz  64oz  Other:___ | 0 1 2 3+ |  | Dried | 0 1 2 3+ | Canned | 0 1 2 3+ |
|  | Juice or Concentrate | 11.5oz 12oz  48oz  64oz  Other:___ | 0 1 2 3+ |  | Dried | 0 1 2 3+ | Canned | 0 1 2 3+ |
|  | Juice or Concentrate | 11.5oz 12oz  48oz  64oz  Other:___ | 0 1 2 3+ |  | Dried | 0 1 2 3+ | Canned | 0 1 2 3+ |
|  | Juice or Concentrate | 11.5oz 12oz  48oz  64oz  Other:___ | 0 1 2 3+ |  | Dried | 0 1 2 3+ | Canned | 0 1 2 3+ |
|  | Juice or Concentrate | 11.5oz 12oz  48oz  64oz  Other:___ | 0 1 2 3+ |  | Dried | 0 1 2 3+ | Canned | 0 1 2 3+ |
|  | Juice or Concentrate | 11.5oz 12oz  48oz  64oz  Other:___ | 0 1 2 3+ |  | Dried | 0 1 2 3+ | Canned | 0 1 2 3+ |
|  | Juice or Concentrate | 11.5oz 12oz  48oz  64oz  Other:___ | 0 1 2 3+ |  | Dried | 0 1 2 3+ | Canned | 0 1 2 3+ |
| **Total Number of WIC-approved shelf stable Fruit Juice Varieties:** | | **Total Number of shelf stable Fruit Juice Varieties:** |  |  | **Total Number of WIC-approved Dried Fruit Varieties:** | **Total Number of Dried Fruit Varieties:** | **Total Number of WIC-approved Canned Fruit Varieties:** | **Total Number of Canned Fruit Varieties:** |

**Vegetables: Juice and Shelf-Stable**

**Location Juice (Shelf-stable): SD H EL L Other_____________**

**Location (Canned): SD H EL L Other_____________**

**Location (Dried): SD H EL L Other_____________**

| **Vegetables** | **Size (circle one)** | **Amount** | **Shelf-Stable** | **Amount** | **Shelf-Stable** | **Amount** |
| --- | --- | --- | --- | --- | --- | --- |
| **Example: V8 or Carrots** | 48oz. 64oz.  Other:___ | 0 1 2 3+ | Dried | 0 1 2 3+ | Canned | 0 1 2 3+ |
|  | 48oz. 64oz.  Other:___ | 0 1 2 3+ | Dried | 0 1 2 3+ | Canned | 0 1 2 3+ |
|  | 48oz. 64oz.  Other:___ | 0 1 2 3+ | Dried | 0 1 2 3+ | Canned | 0 1 2 3+ |
|  | 48oz. 64oz.  Other:___ | 0 1 2 3+ | Dried | 0 1 2 3+ | Canned | 0 1 2 3+ |
|  | 48oz. 64oz.  Other:___ | 0 1 2 3+ | Dried | 0 1 2 3+ | Canned | 0 1 2 3+ |
|  | 48oz. 64oz.  Other:___ | 0 1 2 3+ | Dried | 0 1 2 3+ | Canned | 0 1 2 3+ |
|  | 48oz. 64oz.  Other:___ | 0 1 2 3+ | Dried | 0 1 2 3+ | Canned | 0 1 2 3+ |
|  | 48oz. 64oz.  Other:___ | 0 1 2 3+ | Dried | 0 1 2 3+ | Canned | 0 1 2 3+ |
| **Total Number of WIC-approved shelf stable Vegetable Juice Varieties:** | **Total Number of shelf stable Vegetable Juice Varieties:** | **Total Number of WIC-approved Dried Vegetable Varieties:** | **Total Number of Dried Vegetable Varieties:** | **Total Number of WIC-approved Canned Vegetable Varieties:** | **Total Number of Canned Vegetable Varieties:** | |

**Whole Grains (SHELF STABLE)**

|  | **Size** | **Amount** | **Price** | **Expired? 1 for Yes** |
| --- | --- | --- | --- | --- |
| **Breakfast Cereals** |  |  |  |  |
| Cheerios | 9oz  12oz  18oz  24oz  36oz | 0  1  2  3+ |  |  |
| Shredded Mini-Wheats | 9oz  12oz  18oz  24oz  36oz | 0  1  2  3+ |  |  |
| Ready-to-Eat Cereal___________________ | 9oz  12oz  18oz  24oz  36oz | 0  1  2  3+ |  |  |
| Ready-to-Eat Cereal___________________ | 9oz  12oz  18oz  24oz  36oz | 0  1  2  3+ |  |  |
| Ready-to-Eat Cereal___________________ | 9oz  12oz  18oz  24oz  36oz | 0  1  2  3+ |  |  |
| Ready-to-Eat Cereal___________________ | 9oz  12oz  18oz  24oz  36oz | 0  1  2  3+ |  |  |
| Ready-to-Eat Cereal___________________ | 9oz  12oz  18oz  24oz  36oz | 0  1  2  3+ |  |  |
| Hot Cereal: Oatmeal | 9oz  12oz  18oz  24oz  36oz | 0  1  2  3+ |  |  |
| Hot Cereal: Grits | 9oz  12oz  18oz  24oz  36oz | 0  1  2  3+ |  |  |
| Hot Cereal: Cream of Wheat | 9oz  12oz  18oz  24oz  36oz | 0  1  2  3+ |  |  |
| **Total Number of WIC-approved Cereal Varieties:** | | **Total Number of Cereal Varieties:** | |  |
| **Tortillas/Breads/Grains** | **Size** | **Amount** | **Price** | **Expired? 1 for Yes** |
| Whole Grain Bread | 160z Other:_____________ | 0  1  2  3+ |  | 0 1 |
| **Total Number of WIC-approved Bread Varieties:** | **Total Number of Bread Varieties:** |  |  |  |
|  | **Size (only Fresh)** | **Amount** | **Price** | **Expired? 1 for Yes** |
| Whole Grain Tortilla: Corn | 160z Other:_____________ | 0  1  2  3+ |  |  |
| Whole Grain Tortilla: Wheat | 160z Other:_____________ | 0  1  2  3+ |  |  |
| Whole Grain Buns | 160z Other:_____________ | 0  1  2  3+ |  |  |
| Whole Grain Rolls | 160z Other:_____________ | 0  1  2  3+ |  |  |
| Whole Grain Pasta | 160z Other:_____________ | 0  1  2  3+ |  |  |
| Brown Rice | 16oz  Other:_____________ | 0  1  2  3+ |  |  |
| Other Whole Grain_________ | 16oz  Other:____________ | 0  1  2  3+ |  |  |
| Other Whole Grain_________ | 16oz  Other:_____________ | 0  1  2  3+ |  |  |
| Other Whole Grain_________ | 16oz  Other:____________ | 0  1  2  3+ |  |  |
| Other Whole Grain_________ | 16oz  Other:___________ | 0  1  2  3+ |  |  |
| **Total Number of WIC-approved Shelf-stable Tortilla Varieties:** | | **Total Number of Shelf-stable Tortilla Varieties:** | | |
| **Total Number of WIC-approved Shelf-stable Roll and Bun Varieties:** | | **Total Number of Shelf-stable Roll and Bun Varieties:** | | |
| **Total Number of WIC-approved Shelf-stable Pasta Varieties:** | | **Total Number of Shelf-stable Pasta Varieties:** | | |
| **Total Number of WIC-approved Shelf-stable Rice Varieties:** | | **Total Number of Shelf-stable Rice Varieties:** | | |
| **Total Number of WIC-approved Shelf-stable Other Grains Varieties:** | | **Total Number of Shelf-stable Other Grains Varieties:** | | |

**Infant Food and Formula**

| **Infant Formula** | **Amount** | **Expired?** | **Price** | **Size** | **Brand(s)** |
| --- | --- | --- | --- | --- | --- |
| Infant formula A (Cow's Milk Based, Concentrated) | 0 1 2 3+ | 0 1 |  |  |  |
| Infant formula A (Cow's Milk Based, Powdered) | 0 1 2 3+ | 0 1 |  |  |  |
| Infant formula A (Cow's Milk Based, Ready-to-Feed) | 0 1 2 3+ | 0 1 |  |  |  |
| Infant formula B (Cow's Milk Based, Concentrated) | 0 1 2 3+ | 0 1 |  |  |  |
| Infant formula B (Cow's Milk Based, Powdered) | 0 1 2 3+ | 0 1 |  |  |  |
| Infant formula B (Cow's Milk Based, Ready-to-Feed) | 0 1 2 3+ | 0 1 |  |  |  |
| Infant formula C (Cow's Milk Based, Concentrated) | 0 1 2 3+ | 0 1 |  |  |  |
| Infant formula C (Cow's Milk Based, Powdered) | 0 1 2 3+ | 0 1 |  |  |  |
| Infant formula C (Cow's Milk Based, Ready-to-Feed) | 0 1 2 3+ | 0 1 |  |  |  |
| Infant formula D (Soy Based, Concentrated) | 0 1 2 3+ | 0 1 |  |  |  |
| Infant formula D (Soy Milk Based, Powdered) | 0 1 2 3+ | 0 1 |  |  |  |
| Infant formula D (Soy Milk Based, Ready-to-Feed) | 0 1 2 3+ | 0 1 |  |  |  |
| Infant formula E (Soy Based, Concentrated) | 0 1 2 3+ | 0 1 |  |  |  |
| Infant formula E (Soy Milk Based, Powdered) | 0 1 2 3+ | 0 1 |  |  |  |
| Infant formula E (Soy Milk Based, Ready-to-Feed) | 0 1 2 3+ | 0 1 |  |  |  |
| ***Exempt Formulas (Hypoallergenic/Specialized/Premature)*** |  |  |  |  |  |
| ___________________(Concentrated) | 0 1 2 3+ | 0 1 |  |  |  |
| ___________________(Powdered) | 0 1 2 3+ | 0 1 |  |  |  |
| ___________________(Ready-to-Feed) | 0 1 2 3+ | 0 1 |  |  |  |
| ___________________(Concentrated) | 0 1 2 3+ | 0 1 |  |  |  |
| ___________________(Powdered) | 0 1 2 3+ | 0 1 |  |  |  |
| ___________________(Ready-to-Feed) | 0 1 2 3+ | 0 1 |  |  |  |
| ___________________(Concentrated) | 0 1 2 3+ | 0 1 |  |  |  |
| ___________________(Powdered) | 0 1 2 3+ | 0 1 |  |  |  |
| ___________________(Ready-to-Feed) | 0 1 2 3+ | 0 1 |  |  |  |
| **Total Number of WIC-approved Infant Formula Varieties:** | | **Total Number of Infant Formula Varieties:** | | | |
| ***Nutritionals*** | **Amount** | **Expired?** | **Price** | **Size** | **Brand(s)** |
| ___________________(Concentrated) | 0 1 2 3+ | 0 1 |  |  |  |
| ___________________(Powdered) | 0 1 2 3+ | 0 1 |  |  |  |
| ___________________(Ready-to-Feed) | 0 1 2 3+ | 0 1 |  |  |  |
| ___________________(Concentrated) | 0 1 2 3+ | 0 1 |  |  |  |
| ___________________(Powdered) | 0 1 2 3+ | 0 1 |  |  |  |
| ___________________(Ready-to-Feed) | 0 1 2 3+ | 0 1 |  |  |  |
| ___________________(Concentrated) | 0 1 2 3+ | 0 1 |  |  |  |
| ___________________(Powdered) | 0 1 2 3+ | 0 1 |  |  |  |
| ___________________(Ready-to-Feed) | 0 1 2 3+ | 0 1 |  |  |  |
| **Total Number of WIC-approved Nutritional Varieties:** | | **Total Number of Nutritional Varieties:** | | | |
| **Infant Cereal** | **Amount** | **Expired?** | **Price** | **Size** | **Brand(s)** |
| Dry Infant Cereal: Oatmeal | 0 1 2 3+ | 0 1 |  |  |  |
| Dry Infant Cereal: Rice | 0 1 2 3+ | 0 1 |  |  |  |
| Dry Infant Cereal: Multigrain | 0 1 2 3+ | 0 1 |  |  |  |
| Dry Infant Cereal: __________________ | 0 1 2 3+ | 0 1 |  |  |  |
| **Total Number of WIC-approved Infant Cereal Varieties:** | | **Total Number of Infant Cereal Varieties:** | | | |
| **Infant Foods** | **Amount** | **Expired?** | **Price** | **Size** | **Brand(s)** |
| Baby Food - Fruits & Vegetables (list single foods first then mixed produce foods, e.g., apples and spinach – do not include mixed meat) | | | | | |
| **Example: Apples** | 0 1 2 3+ | 0 1 |  | 4oz Other:___ |  |
|  | 0 1 2 3+ | 0 1 |  | 4oz Other:___ |  |
|  | 0 1 2 3+ | 0 1 |  | 4oz Other:___ |  |
|  | 0 1 2 3+ | 0 1 |  | 4oz Other:___ |  |
|  | 0 1 2 3+ | 0 1 |  | 4oz Other:___ |  |
|  | 0 1 2 3+ | 0 1 |  | 4oz Other:___ |  |
|  | 0 1 2 3+ | 0 1 |  | 4oz Other:___ |  |
|  | 0 1 2 3+ | 0 1 |  | 4oz Other:___ |  |
|  | 0 1 2 3+ | 0 1 |  | 4oz Other:___ |  |
|  | 0 1 2 3+ | 0 1 |  | 4oz Other:___ |  |
| **Total Number of WIC-approved Baby Food Fruit and Vegetable Varieties:** | | | **Total Number of Baby Food Fruit and Vegetable Varieties:** | | |
| **Baby Food Meats (include mixed meats with fruits/vegetables)** | **Amount** | **Expired?** | **Price** | **Size** | **Brand(s)** |
| Baby Food Meat: ______________________ | 0 1 2 3+ | 0 1 |  | 2.5oz  Other:___ |  |
| Baby Food Meat: ______________________ | 0 1 2 3+ | 0 1 |  | 2.5oz  Other:___ |  |
| Baby Food Meat: ______________________ | 0 1 2 3+ | 0 1 |  | 2.5oz  Other:___ |  |
| Baby Food Meat: ______________________ | 0 1 2 3+ | 0 1 |  | 2.5oz  Other:___ |  |
| Baby Food Meat: ______________________ | 0 1 2 3+ | 0 1 |  | 2.5oz  Other:___ |  |
| Baby Food Meat: ______________________ | 0 1 2 3+ | 0 1 |  | 2.5oz  Other:___ |  |
| **Total Number of WIC-approved Baby Food Meat Varieties:** | | | **Total Number of Baby Food Meat Varieties:** | | |

**Non-food Items**

| **Non-food item sold** | **1 for Yes** | **Brand** | **Size** | **Price** |
| --- | --- | --- | --- | --- |
| **Pots and pans** | **0 1** |  |  |  |
| **Spices** | **0 1** |  |  |  |
| **Cleaning products**  **Laundry detergent (oz)**  **Window cleaner (oz)**  **Disinfecting Wipes (# of wipes/container)** | **0 1**  **0 1**  **0 1** |  |  |  |
| **Toilet paper (units)** | **0 1** |  |  |  |
| **Clothing** | **0 1** |  |  |  |
| **Alcohol** | **0 1** |  |  |  |
| **Tobacco** | **0 1** |  |  |  |

**Shelf Space**

| **Shelf Space** | | |
| --- | --- | --- |
| FOOD CATEGORY | DEFINITION | SHELF SPACE |
| Fresh Fruit | *All fresh fruit* | 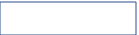feet |
| Fresh Vegetables | *All fresh vegetables* | 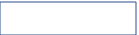feet |
| Frozen Fruit | *All frozen fruit* | 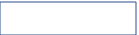feet |
| Frozen Vegetables | *All frozen vegetables* | 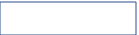feet |
| Canned Fruit | *All canned fruit* | 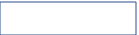feet |
| Canned Vegetables | *All canned vegetables* | 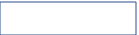feet |
| Bottled water | *INCLUDE only plain water: still & carbonated water with* ***no added caloric/non-caloric sweeteners*** | 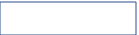feet |
| Sugar sweetened beverages | *INCLUDE all beverages EXCEPT:*   - *Plain water: still & carbonated water with no added caloric/non-caloric sweeteners* - *100% fruit juice, including coconut water* - *Plain milk: cow’s milk and milk substitutes with no added sweeteners* - *Alcohol* | 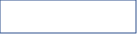feet |
| Packaged Salty Snacks | *INCLUDE all salty snacks EXCEPT:*   - *Nuts and seeds* - *Rice cakes* - *Crackers*   *For example, DO include: chips, popped and/or flavored popcorn, pretzels, salted meat snacks like beef jerky, Cheez-its, Combos, cracker sandwiches and similar salty, processed foods.* | 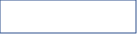feet |
| Packaged Sweet Snacks (Candy & Desserts) | *INCLUDE all sweet snacks EXCEPT:*   - *Refrigerated/ frozen sweet snacks: ice cream and other frozen desserts* - *Cereal and other nutrition bars (e.g., PowerBar, Nutri-Grain bars)* - *Dried fruit*   *For example, DO include: chocolates, other candy, cookies, snack cakes, brownies, pastries/ pies, donuts, sweet rolls and similar sweet processed (shelf stable) foods.* | 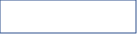feet |

**Appendix B**

**WIC Readiness Score**

| **Categories** |  |  |  |
| --- | --- | --- | --- |
|  | **Score Minimum** | **Score Maximum** | **Proportion Bonus** |
| **Fruit and Vegetables** |  |  |  |
| *Fresh Fruits and Vegetables* |  |  |  |
| Fresh Fruit | 0 | 5 | 2 |
| Fresh Vegetables | 0 | 5 | 2 |
| *Packaged Fruits and Vegetables* |  |  |  |
| Frozen Fruit and Fruit Juice | 0 | 4 | 2 |
| Canned Fruit | 0 | 5 | 2 |
| Dried Fruit | 0 | 5 | 2 |
| Canned Vegetables | 0 | 5 | 2 |
| Dried Vegetables | 0 | 5 | 2 |
| Frozen Vegetables |  | 3 | 2 |
|  |  |  |  |
| **Fruit Juice** |  |  |  |
| Fresh Fruit and Vegetable Juice | 0 | 3 | 2 |
| Shelf-stable Fruit Juice | 0 | 4 | 2 |
| Shelf-stable Vegetable Juice | 0 | 3 | 2 |
|  |  |  |  |
| **Grains** |  |  |  |
| Tortillas | 0 | 1 | 2 |
| Bread | 0 | 1 | 2 |
| Rolls and Buns | 0 | 1 | 2 |
| Pasta | 0 | 1 | 2 |
| Rice | 0 | 1 | 2 |
| Other Grains | 0 | 2 | 2 |
| Cereals (ready-to-eat and hot) | 0 | 4 | 2 |
| Fresh (refrigerated) grains | 0 | 3 | 2 |
| Frozen grains | 0 | 3 | 2 |
|  |  |  |  |
| **Dairy/Dairy Substitutes** |  |  |  |
| Fresh Milk | 0 | 5 | 2 |
| Shelf-stable Milk | 0 | 5 | 2 |
| Cheese | 0 | 5 | 2 |
| Yogurt | 0 | 1 | 2 |
| Lactose Free Milk | 0 | 1 |  |
| Dairy Substitutes (goat and soy milk) | 0 | 1 |  |
| Tofu | 0 | 1 | 2 |
|  |  |  |  |
| **Proteins** |  |  |  |
| Eggs | 0 | 1 | 2 |
| Peanut Butter | 0 | 1 | 2 |
| Canned Fish | 0 | 2 | 2 |
| Beans and Legumes | 0 | 5 | 2 |
|  |  |  |  |
| **Infant Food/Formula** |  |  |  |
| Infant Formula | 0 | 5 | 2 |
| Hypoallergenic/Specialized formula | 0 | 5 |  |
| Nutritional (Toddler Drinks) | 0 | 5 | 2 |
| Infant Cereal | 0 | 5 | 2 |
| Infant Baby Food Fruits and Vegetable | 0 | 5 | 2 |
| Infant Baby Food Meat/Mixed | 0 | 5 | 2 |
|  |  |  |  |
| **Total** | **0** | **122** | **68** |
| **Potential Range** | **0** | **190** |  |

**Appendix C**

**Healthy Food Availability Score**

| **Item Category** | **Sub-category of item** | **Availability of Healthier Item** | **Availability Total Points** | | **Price** | **Price Total Points** | **Quality** | **Quality Total Points** | |
| --- | --- | --- | --- | --- | --- | --- | --- | --- | --- |
|  |  |  | **Min** | **Max** |  |  |  | **Min** | Max |
| Fruits | Fresh | 0 varieties = 0 pts 1-2 varieties =1 pts 3-4 varieties =2 pts < 5 varieties = 3 pts | 0 | 3 |  |  | 25-49% acceptable = 1 pt 50-74% acceptable = 2 pts 75%+ acceptable = 3 pts | 1 | 3 |
| Non-fresh | Frozen = 1 Canned = 1 Dried = 1 | 0 | 3 |  |  | N/A |  |  |
| Vegetables | Fresh | 0 varieties = 0 pts 1-2 varieties =1 pts 3-4 varieties =2 pts < 5 varieties = 3 pts | 0 | 3 |  |  | 25-49% acceptable = 1 pt 50-74% acceptable = 2 pts 75%+ acceptable = 3 pts | 1 | 3 |
| Non-fresh | Frozen = 1 Canned = 1 Dried = 1 | 0 | 3 |  |  | N/A |  |  |
| Juice | Fresh Fruit juice | 0 varieties = 0 pts 1-2 varieties =1 pts 3-4 varieties =2 pts < 5 varieties = 3 pts | 0 | 3 |  |  | N/A |  |  |
| Fresh Vegetable juice | 0 varieties = 0 pts 1-2 varieties =1 pts 3-4 varieties =2 pts < 5 varieties = 3 pts | 0 | 3 |  |  | N/A |  |  |
|  | Shelf-stable Fruit Juice | Frozen (concentrate) =1  1-2 varieties =1 pts 3-4 varieties =2 pts < 5 varieties = 3 pts | 0 | 3 |  |  | N/A |  |  |
|  | Shelf-stable Vegetable Juice | Frozen (concentrate) =1  1-2 varieties =1 pts 3-4 varieties =2 pts < 5 varieties = 3 pts | 0 | 3 |  |  | N/A |  |  |
| Grains and Tortillas (Corn tortilla, Wheat tortilla, Whole grain bread, buns, rolls and pasta)  Cereal | Fresh (comes from a local bakery) | Yes (for any between tortilla/bread/buns/rolls/pasta) = 1  > 2 variety of any = 1 pt | 0 | 2 |  |  | Expired = -1 | -1 |  |
| Frozen | Yes (for any between tortilla/bread/buns/rolls/pasta) = 1  > 2 variety of any = 1 pt | 0 | 2 |  |  | Expired = -1 | -1 |  |
| Shelf-stable | Yes (for any between tortilla/bread/buns/rolls/pasta) = 1  > 2 variety of any = 1 pt | 0 | 2 |  |  | Expired = -1 | -1 |  |
| Cereal | Yes (healthier cereal) = 2pts > 2 varieties of any = 1 pt  Hot cereal = 1 pt | 0 | 4 |  |  | N/A |  |  |
| Dairy | Milk- Fresh | Low-fat/skim milk = 2 pts Whole milk =1 pt  Milk substitute / any plant-based milk substitute = 1 Lactose-free =1 | 0 | 5 | Lower for lowest fat = 2 pts Same for both = 1 pt Higher for low-fat = -1 pt | -1 to 4 | Expired = -1 | -1 |  |
| Milk Shelf-stable (Liquid/Powdered) | Yes (for milk/milk substitute/lactose free milk)= 1 pt | 0 | 1 |  |  | Expired = -1 | -1 |  |
| Yogurt | Low-fat yogurt = 2 pts Whole milk yogurt =1 pt  Plant-based yogurt = 1 pt | 0 | 4 |  |  | Expired = -1 | -1 |  |
| Cheese | Block / Slice cheese / Shredded cheese/Cheese stick =1 pt Plant-based cheese =1 pt | 0 | 2 |  |  | Expired = -1 | -1 |  |
| Tofu | Yes= 1 pt | 0 | 1 |  |  | Expired = -1 | -1 |  |
| Proteins | Fresh | Yes (Meat) = 1 pt >2 varieties = 1 pt  Eggs = 1 pt | 0 | 3 |  |  | Expired = -1 | -2 |  |
| Frozen | Yes (Meat) = 1 pt >2 varieties = 1 pt  Tofu meal = 1pt | 0 | 3 |  |  | N/A |  |  |
| Shelf-stable | Fish (canned) = 1 pt > 2 varieties = 1 pt | 0 | 2 |  |  | N/A |  |  |
| Beans dried = 1 pt Beans canned =1 pt > 2 varieties (Dry) =1 pt > 2 varieties (Canned) =1 pt  Lentil (D/C) = 1 pt Peas (D/C) = 1 pt | 0 | 6 |  |  | N/A |  |  |
| Peanut butter Yes = 1 pt | 0 | 1 |  |  | N/A |  |  |
| **Total points** |  |  | **0** | **62** | **-1** | **4** |  | **-10** | **6** |

**Appendix D**

**Community Resourcefulness Score**

| **Community Resourcefulness** |  |  |  |  |
| --- | --- | --- | --- | --- |
| **Inside/Outside Score Combined (high score = optimal) (low score = needs work)** | **Score** |  | **Non-Food Items Score** | **Score** |
|  |  |  |  |  |
| ***Cleanliness Sub score*** |  |  | ***Household Essentials Items (0 to 7 points possible)*** |  |
| Trash/Debris | -1 |  | Pans yes = +1 | 1 |
| Broken Glass | -1 |  | Disinfectant Wipes yes = +1 | 1 |
| Graffiti | -1 |  | Toilet Paper yes = +1 | 1 |
| Landscaping | 1 |  | Clothing yes = +1 | 1 |
| ***Safety Sub score*** |  |  | Window Cleaner yes = +1 | 1 |
| Loitering | -1 |  | Spices yes = +1 | 1 |
| Security Cameras | 1 |  | Laundry Detergent yes = +1 | 1 |
| Security Bars on windows/doors | 1 |  |  |  |
| High Shelving/can't see across | -1 |  | ***Vice Items Sub score (-2 to 0 points possible)*** |  |
| Security Personnel | 1 |  | Alcohol yes = -1 | -1 |
| Panhandling | -1 |  | Tobacco yes = -1 | -1 |
|  |  |  |  |  |
|  |  |  |  |  |
| **Convenience Sub score** |  |  |  |  |
| Shopping cart rails | 1 |  |  |  |
| Number of Checkouts | 1 | (+1 for each checkout) |  |  |
|  |  |  |  |  |
| **Access Sub score** |  |  |  |  |
| Bus stop nearby | 1 |  |  |  |
| Accepts SNAP/EBT | 1 |  |  |  |
| Accepts WIC | 1 |  |  |  |
|  |  |  |  |  |
| **Possible Total Minimum** | -8 |  |  |  |
| **Possible Total Maximum** | 16 | 16+ additional checkouts |  |  |
